# Supplementary material for: Clinical Features and Gene Mutations of Lung Cancer Patients 30 Years of Age or Younger
Source: PLoS One. 2015 Sep 2;10(9):e0136659. doi: 10.1371/journal.pone.0136659 (PMC4557988; doi:10.1371/journal.pone.0136659)
Supplement: S1 Table — (XLSX) [file pone.0136659.s001.xlsx]

## Sheet: 工作表2
S1 Tabel. Pathologic characteristics of 26 lung adenocarcinoma patients
Variables	Total (n=26)	ALK positive (n=5)	EGFR mutant (n=5)
Predominant histologic pattern
Acinar	14(53.8)	2(40.0)	4(80.0)
Lepidic	1(3.8)	0	0
Solid	8(30.8)	3(60.0)	1(20.0)
Papillary	0	0	0
Micropapillary	0	0	0
Others	3(11.5)	0	0
Micropapillary feature	4(15.4)	1(20.0)	2(40.0)
Lepidic growth pattern	2(7.7)	0	2(40.0)
Signet ring cell feature	3(11.5)	2(40.0)	0
